1 **TITLE**

2 Cross-Cultural Adaptation of the Physician Orders for Life-Sustaining Treatment  
3 Form in Greece; a pilot cross-sectional descriptive study

4 **SHORT TITLE**

5 Physician Orders for Life-Sustaining Treatment Form in Greece

6 Dimitrios C. Moustakas<sup>1</sup>, Alexia Bani<sup>1</sup>, Eleni Ntalaouti<sup>2</sup>, , Nikolaos Vechlidis<sup>2</sup>,  
7 Charalampos Charalampidis<sup>2</sup>, Stamatios Chalvatzis<sup>2</sup>, Sotiria Grigoropoulou<sup>2</sup>,  
8 Stylianos Faltsetas<sup>1</sup>, Dimitrios T. Boumpas<sup>3</sup>, Evrydiki Kravvariti<sup>4</sup>, Theodoros  
9 Trokanas<sup>5</sup>, Effy Vayena<sup>6</sup>, Sotirios Tsiodras<sup>2</sup>.

10 1. National & Kapodistrian University of Athens, Medical School, Athens,  
11 Greece

12 ORCID: 0000-0003-3934-273X.

13 2. Fourth Department of Internal Medicine, National and Kapodistrian  
14 University of Athens Medical School, Athens, Greece.

15 3. Rheumatology and Clinical Immunology Unit, "Attikon" University Hospital,  
16 National and Kapodistrian University of Athens, Athens, Greece

17 4. 1st Department of Propaedeutic Internal Medicine, Laikon University  
18 Hospital, National and Kapodistrian University of Athens, Athens, Greece

19 5. Hellenic Republic National Commission for Bioethics and Technoethics,  
20 Athens University of Economics and Business, Open University Cyprus

21 6. Health Ethics and Policy Lab, Institute of Transitional Medicine, ETH Zurich ,  
22 Switzerland

23 **Address correspondence**

24 Dimitrios C. Moustakas, RN, MSc, PhD©

25 National & Kapodistrian University of Athens, Medical School, Athens, Greece

26 ORCID: 0000-0003-3934-273X.

27 Mob: +306975523647

28 Email: [moustakas.dimitriss@gmail.com](mailto:moustakas.dimitriss@gmail.com)

29 **Running title:** Cross-Cultural Adaptation of Physician Orders for Life-Sustaining  
30 Treatment in Greece: a Pilot Cross-Sectional Descriptive Study

31 **Word count:** 2900

32 **Abstract word count:** 247

33 **Figures:** 1

34 **Tables:** 2

35 **Supplementary file:** 1

36 **Disclosure Statement**

37 The authors report there are no competing interests to declare.

38 **Founding Source:** None

39 **Data availability statement**

40 The authors confirm that the data supporting the findings of this study are available  
41 within the article and its supplementary materials.

42 **Acknowledgements**

43 The authors would like to thank Dr. MULLOWNEY, Medical Director of the Oregon  
44 POLST Program, Chair of the Oregon POLST Coalition and Assistant Professor of  
45 Medicine, Division of General Internal Medicine and Geriatrics, School of Medicine  
46 at OHSU (Oregon Health & Science University) for her helpful advice and comments.  
47 We would also like to thank Shannon Hubbs for her editorial assistance in the  
48 preparation of the manuscript.

49

50

## 51 **ABSTRACT**

52 The current legal framework in Greece does not permit withholding medical  
53 interventions to allow natural death, leading to a lack of documented advance  
54 directives to guide clinical practice. The aim of this pilot descriptive study is to  
55 culturally adapt the Physician Orders for Life-Sustaining Treatment (POLST) form,  
56 and use it as a framework with which to assess the readiness of Greek residents for  
57 discussions on medical care near the end of life. Patients with severely limited  
58 prognosis and/or their family members were interviewed by attending physicians who  
59 then recorded their wish with regards to Do-Not-Resuscitate (DNR) status on the  
60 adapted POLST form, as well as their level of agreement with signing a similar form.  
61 Thirty-one patients with an age range of 18 to 109 years old participated. All had  
62 severe prognosis due to various end-stage diseases. Sixteen patients (51.6%) wished  
63 for DNR status and didn't wish for further intervention in case they suffered cardio-  
64 respiratory arrest. Presence of an end-stage malignancy was associated with a higher  
65 chance of DNR preference (OR: 8.8, 95%CI 1.5-50,  $p = 0.017$ ) or comfort measures  
66 only (OR: 5.6, 95%CI 1.1-30,  $p = 0.05$ ). This pilot study of patients with severe  
67 prognosis hospitalized in a tertiary care center in Greece showed preliminary evidence  
68 of high acceptance of natural death and DNR status. POLST forms could be used as a  
69 framework for advance care planning through shared decision-making, thus reducing  
70 unwarranted treatments and enhancing trust between healthcare professionals and  
71 patients at the end of life.

## 72 **INTRODUCTION**

73 The application of new technologies in medicine has introduced an array of  
74 biomedical interventions, with broad potential to save countless lives (1). Excessive  
75 zeal can characterize the medical community's approach to artificially maintaining a  
76 dying patient, employing all available scientific and technological options to achieve a  
77 'victory' over death, irrespective of the suffering such interventions may cause (2).  
78 Herein lies the concept of 'dysauthanasia' (dys = difficulty, deprivation // dysauthan =  
79 adjective: dying twice; in Latin, dis implies separation and denial). Originally  
80 proposed in 1904 by Morcache, dysauthanasia is understood as the preservation of life

81 through disproportionate medical efforts, i.e. as a synonym for therapeutic obsession  
82 leading to a prolonged process of death, and physical or psychological suffering (2).

83 According to data published by the US Centers for Disease Control and Prevention  
84 (CDC), the number of inpatient hospital deaths decreased from 776,000 to 715,000  
85 (an 8% decrease), despite an 11% increase in admissions related to advances in  
86 palliative and pre-hospital care (3). The most significant decreases in the number of  
87 inpatient deaths were observed in patients with end-stage renal failure and cancer  
88 patients (4). In a report from Greece 20 years ago, the majority of critically ill patients  
89 with a low prognostic index were dying in the hospital setting (5). Specifically, cancer  
90 patients in urban centers showed a disproportionately high incidence of in-hospital  
91 death, compared to those living in the countryside (6). However, in a small  
92 population-based study conducted from 1993 to 2003, only 10% (n=219) of patients  
93 with end-stage neoplastic disease expressed a wish to die in hospital (7).

94 The pandemic caused by the Covid-19 virus brought similar dilemmas concerning end  
95 of life support, communication with family members, and the health care provider's  
96 role in decisions about patients in an overburdened healthcare setting – especially in  
97 the highest risk elderly patients, who often suffer from multiple comorbidities (8).  
98 Due to pandemic public health measures, hospitals were forced to deny visits from  
99 relatives, resulting in many patients dying alone, the relatives' caregiving role  
100 abolished (9). Many patients and their relatives elected to refuse intensive care unit  
101 (ICU) admission and/or intubation, possibly influenced by prevailing public opinion  
102 or misinformation. The concept of making medical decisions based solely on  
103 individual needs shifted especially in the intense initial phase of the pandemic,  
104 towards an approach that prioritized efficient use of resources, focused on caring for  
105 and saving as many patients as possible (10).

106 End-of life decisions during the pandemic were entangled with serious social  
107 challenges introduced by pandemic control measures. Nonetheless, the circumstances  
108 brought to the fore the lack of institutional mechanisms for properly recording patient  
109 wishes, and the legal vacuum surrounding patient desires for withholding treatment in  
110 end-of life situations. This issue, exacerbated during the pandemic, it is a daily reality  
111 in hospitals that requires resolution (11). In Greece at present, patient wishes are not

112 formally recorded, with neither inpatient nor outpatient medical records including  
113 instructions on life-sustaining medical procedures. Furthermore, the legal framework  
114 on allowing natural death is ambiguous, to say the least (12). Recent studies point to  
115 the significant impact that respecting patient wishes has on the quality of care, and on  
116 compliance of critically ill patients with treatment plans (13).

117 The aim of this pilot study was to adapt the POLST form for use in the culturally and  
118 linguistically diverse context of Greece (14). We sought to evaluate the feasibility and  
119 acceptability of implementing the adapted form, assessing factors such as ease of use,  
120 time required for completion, perceived utility among healthcare professionals and  
121 patients, and related knowledge and attitudes.

## 122 **METHODS**

### 123 **Study design**

124 This pilot cross-sectional descriptive study was performed using the STROBE  
125 (Strengthening the Reporting of Observational Studies in Epidemiology (STROBE)  
126 Statement guidelines (15). In short, the study involved the cross-cultural adaptation of  
127 the copyrighted form of Oregon Portable Orders for Life Sustaining Treatment  
128 (POLST) and the pilot study. The adapted POLST form was used to assess attitudes  
129 towards allowing natural death, among patients facing severe prognosis in a clinical  
130 practice setting at a tertiary care center in Greece.

### 131 **Setting and Participants**

132 Eligible participants were all consenting consecutive patients hospitalized at the 4th  
133 Internal Medicine Department of the University General Hospital “Attikon” with a  
134 severely limited prognosis, based on the Gagné Index for patients over 65 years old,  
135 and the Walter Index for patients over 75 years old (16,17). Recruitment was carried  
136 out between December 2023 and February 2024.

### 137 **Patient involvement**

138 Patients with a severely limited prognosis and their families were not involved in  
139 setting the research question or study design. Patients and their families were central  
140 to dissemination of the baseline information, which helped to motivate community  
141 involvement during and beyond the study.

#### 142 **Primary outcome**

143 To adapt the POLST form for use in the context of Greece by creating the Attikon  
144 POLST Modified Form and to evaluate the feasibility and acceptability of  
145 implementing the adapted form in the clinical setting.

#### 146 **Secondary outcome**

147 To assess factors such as ease of use, time required for completion, perceived utility  
148 among healthcare professionals and patients, and related knowledge and attitudes.

#### 149 **Data management**

150 All data will be anonymised and compliant with regulations including GDPR and ICH  
151 Good Clinical Practice (18).

#### 152 **Sample Size**

153 Sample size was arrived based on similar pilot studies in this field and standard  
154 recommendations (19–21).

#### 155 **Translation and cultural adaptation**

156 The methodology for the POLST form adaptation was based upon the  
157 Principles of Good Practice for the Translation and Cultural Adaptation Process for  
158 Patient-Reported Outcomes Measures of the International Society of  
159 Pharmacoeconomics and Outcomes Research (ISPOR)(22). Each step of the  
160 process is described below (See Figure.1)

- 161 • Preparation. Decision about which form to use as the source for adaptation.  
162 Request and obtain permission to use the copyrighted form of Oregon Portable

163 Orders for Life Sustaining Treatment (POLST) from the Center for Ethics in  
164 Health Care at Oregon Health and Science University (OHSU) in Portland,  
165 Oregon, United States (23).

- 166 • The study was approved by the hospital ethical and scientific board
- 167 • Forward Translation. Three native Greek speakers fluent in English performed  
168 translations of the source into Greek. Two of those translators were senior  
169 medical students and the third was an English philosophy teacher.
- 170 • Reconciliation. A team of four healthcare professionals compared and merged  
171 the three translations into a single forward translation.
- 172 • Back Translation. Two native English speakers fluent in Greek performed  
173 independent back translations into the original language.
- 174 • Back Translation Review. This version was sent back to OHSU for  
175 comparison of the back-translated version of the instrument with the original  
176 and revised versions.
- 177 • Cognitive Debriefing/Pilot testing and finalization. Form reviewed by eight  
178 healthcare professionals who were staff members of the internal medicine  
179 clinic and revision of the form followed, according to their comments. Then,  
180 this pilot cross-sectional study was performed in a sample of 31 severely ill  
181 patients with poor prognosis and low expected 1-year survival rate. The  
182 questionnaire was completed by the research team at the patient's bedside in  
183 the form of an interview. In the case of a patient's inability, the interview and  
184 data collection was performed with the patient's next-of-kin or other closed  
185 providing usual daily care at home.
- 186 • Consultation with an attorney (Athens University professor of law) and  
187 presentation of the final form to OHSU.
- 188 • Proofreading and final report. Researchers checked the form for minor print  
189 errors and produced a detailed report in Greek concerning each adaptation  
190 decision made throughout the study.

191 Our team chose to use the 2023 version of the Oregon POLST form as our primary  
192 source, after obtaining permission from the medical director of the Oregon POLST  
193 program. While multiple forms are used across the United States, Oregon is the state  
194 with the oldest POLST program (24). The investigative team obtained permission on

195 the behalf of the medical director of the Oregon POLST program. The source versions  
196 of the Oregon POLST form, the final version of the “Attikon Modified” form adapted  
197 to the Greek context, and the back translation are available upon request  
198 (Supplementary material Appendix).

199 The form’s readability level was a concern. To ensure comprehension and accurate  
200 understanding, physicians were instructed to administer the completion of the  
201 questionnaire at the patient’s bedside in the form of an interview, with the patient or  
202 an authorized relative. While in several US states, various healthcare professionals are  
203 authorized to sign POLST forms, in Greece advance care planning conversations are  
204 considered the responsibility of physicians, and thus only medical doctors were  
205 authorized to sign the form. At present, these conversations are not addressed by a  
206 specific legal framework, despite the presence of ethics boards in local hospitals of  
207 the national health system.

## 208 **Statistical analysis**

209 Basic descriptive analysis was performed using SPSS V29 (IBM SPSS  
210 Statistics for Windows, Version 29.0, Armonk, NY: IBM Corp.). Patients’ baseline  
211 clinical parameters were recorded as absolute numbers and proportions for categorical  
212 data, and as median and interquartile ranges for continuous data. Sample size was  
213 calculated based on methodology proposed by Rotondi and Donner, as well as  
214 previous studies(25–28). All patients approached for study participation accepted and  
215 signed a consent form.

## 216 **RESULTS**

217 The pilot descriptive study included 31 patients with an age range of 18 to 109 years.  
218 A list of medical diagnoses is provided in Table 1. Most participants had underlying  
219 end-stage malignancy (32.3%) or a neurological condition (22.6%) and multiple  
220 comorbidities (Table 1). According to Gagne and Walter indexes, all included patients  
221 had a severe prognosis and high risk of 1-year mortality (16,17). Twenty-seven  
222 patients were aged 65 years or older at the time the form was signed, and 64.5 % were  
223 female (35.5 % male). Patient residence was categorized as “urban” or “rural”, with a



224 majority (72.2%) coming from urban settings. In most cases, discussion took place  
225 with a relative (67,7%).

226 Overall, 16 patients (51.6%) wished for DNR status and did not desire further  
227 intervention in the case of cardio-respiratory arrest. Of these participants, discussion  
228 took place with 12 relatives (57,1%), 1 authorized person, and 3 patients. Fifteen  
229 patients (48.4%) wished to attempt resuscitation (Table 1). Furthermore, 13 patients  
230 (41.9%) wished for Selective Treatment Orders (generally avoid the intensive care  
231 unit), 10 (32.3%) for Comfort Measures Only (patient prefer no transfer to hospital  
232 for life-sustaining treatments. Transfer if comfort needs cannot be met in current  
233 location), and 8 (25.8%) for Full Treatment Orders (transfer to hospital and/or  
234 intensive care unit, if indicated) (Table 1). Over the course of the interviews, none of  
235 the four interviewers reported a lack of clarity in completing the form. Statistical  
236 significance for patients desiring or not desiring intervention is shown in Table 2.  
237 Presence of an end-stage malignancy was associated with a higher preference for  
238 DNR (OR: 8.8, 95%CI 1.5-50,  $p = 0.017$ ) or comfort measures only (OR: 5.6, 95%CI  
239 1.1-30,  $p = 0.05$ ). Statistical analysis of differences between urban and rural status,  
240 age, and comorbidity status did not reveal noteworthy differences.

## 241 **DISCUSSION**

242 To our knowledge, this is the first study to explore the possible  
243 implementation of Portable Orders for Life–Sustaining Treatment in Greece. As a  
244 component of advance care planning, POLST could increase engagement in the  
245 therapeutic plan as well as increase trust between patients and doctors (29,30). The  
246 2014, the report ‘Dying in America’, by the Committee on Approaching Death:  
247 Addressing Key End of Life Issues; Institute of Medicine, suggested that all states  
248 have the responsibility to create a POLST program (31). POLST is a method of  
249 recording and honoring patient’s attitudes regarding DNR orders and selective  
250 treatment options (32,33). According to Sinclair C., “the phrase ‘do not resuscitate’  
251 signals an intent to withhold or refuse. It says you’re not going to do something. To  
252 ‘allow natural death,’ on the other hand, connotes permission. It doesn’t sound so  
253 overwhelming or scary” (34). A non-randomized study from Hahnemann University  
254 Hospital in Philadelphia, reported that 78-83% of healthcare professionals would  
9

255 consent to an “Allow Natural Death” (AND) order if a requested patient was near  
256 death (35).

257 In many countries, DNR orders are not legally binding, and thus, fulfillment of patient  
258 wishes is not guaranteed. Studies from several European countries have found that the  
259 preference for withdrawal of therapy is more common in northern Europe (Denmark,  
260 Finland, Ireland, Sweden, Switzerland, England, Scotland, Belgium and the  
261 Netherlands) than in southern Europe (Greece, Italy, Portugal, Israel, Spain and  
262 Turkey) (36–38).

263 The development of legal treatment of POLST in Greece would involve the  
264 Convention of the Council of Europe for the Protection of Human Rights and Dignity  
265 of the Human Being, with regard to the Application of Biology and Medicine:  
266 Convention on Human Rights and Biomedicine (hereinafter the Oviedo  
267 Convention)(39), the Greek Code of Medical Deontology (hereinafter CMD), and the  
268 Greek Penal Code.

269 Article 9 of the Oviedo Convention, ratified with Greek Law 2619/1998, provides that  
270 “The previously expressed wishes relating to a medical intervention by a patient who  
271 is not, at the time of the intervention, in a state to express his or her wishes shall be  
272 taken into account”. This provision appears to be limited to living wills, thus  
273 excluding health-care proxy directives from its scope. Furthermore, the wording  
274 “shall be taken into account” is legally ambiguous concerning the binding effect in  
275 signatory member states. The issue is further clouded by §62 of the Explanatory  
276 Report to the Oviedo Convention, which acknowledges that “taking previously  
277 expressed wishes into account does not mean that they should necessarily be  
278 followed”. In this way, and without explicit mention in the legal text, the possibility  
279 of disregarding a patient’s wishes is introduced. The Oviedo Convention seemingly  
280 does not directly affect the legal force of living wills at a national level, especially in  
281 signatories where living wills are not legally binding (e.g. Greece), while it accepts  
282 medical paternalism to a certain extent in the area of advance directives.

283 On the other hand, DNR orders constitute an issue of penal law within the ambit of  
284 the Greek Penal Code; in particular its Articles 299, 300 and 301, which criminalize

285 intentional homicide, ‘consensual homicide’ (euthanasia), and ‘suicidal complicity’,  
286 respectively (in the case of a DNR order by omission)(40).

287 Greek Law 3418/2005, which integrated the Code of Medical Deontology, regulates  
288 solely palliative care as an end-of-life choice for terminally ill patients. Specifically,  
289 according to Article 29 § 1 CMD “At the final stage of an incurable illness, even if all  
290 treatment margins have been exhausted, a doctor shall ensure the psychosomatic pain  
291 relief of the patient. The doctor offers palliative care and collaborates with his or her  
292 close members in this direction. In any case, the doctor shows compassion to the  
293 patient until the end of his life and ensures that the patient maintains his dignity until  
294 this point”. Introducing the notion of ‘futile treatment’ (or ‘therapeutic obstinacy’),  
295 this article accepts the occurrence of death, without hastening it. However, the article  
296 does not treat the patient by ‘allowing to die’ or ‘letting die’, which entails an  
297 intentional avoidance of causal intervention (e.g. CPR), so that disease, system failure  
298 or injury causes death. For this reason, Article 29 § 1 CMD does not clash with  
299 Articles 299, 300 and 301 of the Greek Penal Code, which criminalize acts of ‘killing’  
300 (40).

301           The adaptation of the POLST form for the Greek context, along with the  
302 creation of the “Attikon Modified” POLST form, require compliance with the Greek  
303 law and regulations, and staff education concerning those laws. The methodological  
304 steps taken were in accordance with ISPOR; the guidance of principles for future  
305 adaptation of POLST to other countries by Mayoral F.S. et al. 2018; and the  
306 Consensus-based Standards for the Selection of Health Status Measurement  
307 Instruments (COSMIN) checklist.(17,23,37–39).

308 Our pilot study consisted of 31 patients with a poor prognosis, primarily aged 65 and  
309 over. Despite this small sample, we can offer some useful preliminary observations.  
310 In Greek hospitals, decisions at the end of life are commonly discussed with relatives  
311 (67,7%). If DNR alternative was offered, 51,6% of the patients and family members  
312 commented that they would choose this option. More than half of the relatives 57,1%  
313 expressed preference for a for DNR status. If this preference were to hold true in a  
314 larger study, it would present a significant point of concern for the healthcare system,  
315 given that at present, a DNR option is not available to patients in Greece. Notably, full

316 life-saving treatment was in accordance with the wishes of only 25,8% of the patients  
317 and relatives.

318 The present study has several limitations. First, none of the translators were certified  
319 professional translators. The existing 1-year mortality risk scores show moderate  
320 prognostic performance, discriminatory power and calibration, when used in older  
321 adults with multiple comorbidities (40). The study was restricted to one hospital in  
322 Athens. However, cross-cultural adaptation could be considered equal for a country in  
323 which one language is spoken across all regions. The POLST form provides a  
324 foundation for future research and implementation efforts not only within Greece, but  
325 also for other Greek-speaking regions such as Cyprus.

## 326 **CONCLUSION**

327 Our pilot study, sheds light on critical aspects of end-of-life decision-making  
328 in modern Greek healthcare settings. The absence of a legally binding DNR option  
329 prevents medical professionals from fulfilling patient preferences and promoting the  
330 best quality of care at the end of life. Despite the study's limitations, including its  
331 single-site focus, the findings offer valuable insights into the current landscape of  
332 end-of-life care in Greece. Moving forward, continued efforts are needed to enhance  
333 staff training, expand research scope, and engage stakeholders in advancing end-of-  
334 life care practices. Improvement of the current legal framework through establishment  
335 of a new framework is of tremendous importance.. By addressing these challenges  
336 and building upon our findings, we can strive towards a more patient-centered  
337 approach to end-of-life care that respects individual preferences, fosters trust between  
338 patients and healthcare providers, and upholds the principles of dignity and autonomy  
339 in healthcare decision-making.

340 **FUNDING SOURCE:** None

## 341 **ABBREVIATIONS**

342 D.N.R: Do Not Resuscitate

343 A.N.D: Allow Natural Death

344 CDC: Center for Disease Prevention

345 ICU: Intensive Care Unit

346 POLST: Portable Orders for Life-Sustaining Treatment

347 Bibliography

348 1. Welsch K, Gottschling S. Wishes and Needs at the End of Life. *Dtsch Arztebl*  
349 *Int.* 2021 Apr;118(17):303–12.

350 2. Siqueira-Batista R, Schramm FR. [Plato's philosophy and the bioethical  
351 debate on the end of life: intersections in public health]. *Cad Saude Publica.*  
352 2004;20(3):855–65.

353 3. Kanzaria HK, Probst MA, Hsia RY. Emergency Department Death Rates  
354 Dropped By Nearly Fifty Percent, 1997–2011. *Health Aff (Millwood)*. 2016 Jul  
355 1;35(7):1303–8.

356 4. MD RHS. Harvard Health. 2018 [cited 2023 Nov 1]. Where people die.  
357 Available from: [https://www.health.harvard.edu/blog/where-people-die-](https://www.health.harvard.edu/blog/where-people-die-20181031115278)  
358 20181031115278

359 5. Hays JC, Galanos AN, Palmer TA, McQuoid DR, Flint EP. Preference for  
360 place of death in a continuing care retirement community. *Gerontologist*. 2001  
361 Feb;41(1):123–8.

362 6. Tang ST, Mccorkle R. Determinants of congruence between the preferred and  
363 actual place of death for terminally ill cancer patients. *J Palliat Care*. 2003;19(4):230–  
364 7.

365 7. Mystakidou K, Parpa E. Where Do Cancer Patients Die in Greece? A  
366 Population-Based Study on the Place of Death in 1993 and 2003. 2009;38(2).

- 367 8. CDC. Centers for Disease Control and Prevention. 2023 [cited 2023 Nov 3].  
368 CDC Museum COVID-19 Timeline. Available from:  
369 <https://www.cdc.gov/museum/timeline/covid19.html>
- 370 9. Meisenberg BR, Qureshi S, Somasekar MT, Ali Q, Karpman M, Rhule J.  
371 Covid-19 Mortality in an Acute Care Hospital: Association of Patient Factors With  
372 Decision to Forego the Intensive Care Unit. *Am J Hosp Palliat Care*. 2022  
373 Apr;39(4):481–6.
- 374 10. Ciaffa J. The Ethics of Unilateral Do-Not-Resuscitate Orders for COVID-19  
375 Patients. *Journal of Law, Medicine & Ethics*. 2021 Dec;49(4):633–40.
- 376 11. Hafner K. ‘A Heart-Wrenching Thing’: Hospital Bans on Visits Devastate  
377 Families. *The New York Times* [Internet]. 2020 Mar 29 [cited 2023 Nov 1];  
378 Available from: <https://www.nytimes.com/2020/03/29/health/coronavirus-hospital-visit-ban.html>  
379 [visit-ban.html](https://www.nytimes.com/2020/03/29/health/coronavirus-hospital-visit-ban.html)
- 380 12. Charisi A, Deliligka A, Koutsoukis D, Raikos N. Living wills in Greece:  
381 bioethical dilemmas and legal parameters. 2014;41(3).
- 382 13. Sadeghi B, Walling AM, Romano PS, Ahluwalia SC, Ong MK. A Hospital-  
383 Based Advance Care Planning Intervention for Patients with Heart Failure: A  
384 Feasibility Study. *J Palliat Med*. 2016 Apr;19(4):451–5.
- 385 14. 2023 POLST Form | Oregon POLST [Internet]. [cited 2024 Mar 6]. Available  
386 from: <https://oregonpolst.org/about/2023-polst-form/>
- 387 15. von Elm E, Altman DG, Egger M, Pocock SJ, Gøtzsche PC, Vandenbroucke  
388 JP, et al. The Strengthening the Reporting of Observational Studies in Epidemiology  
389 (STROBE) statement: guidelines for reporting observational studies. *J Clin  
390 Epidemiol*. 2008 Apr;61(4):344–9.
- 391 16. Gagne JJ, Glynn RJ, Avorn J, Levin R, Schneeweiss S. A combined  
392 comorbidity score predicted mortality in elderly patients better than existing scores. *J  
393 Clin Epidemiol*. 2011 Jul;64(7):749–59.

- 394 17. Walter LC, Brand RJ, Counsell SR, Palmer RM, Landefeld CS, Fortinsky RH,  
395 et al. Development and validation of a prognostic index for 1-year mortality in older  
396 adults after hospitalization. *JAMA*. 2001 Jun 20;285(23):2987–94.
- 397 18. Good clinical practice | European Medicines Agency (EMA) [Internet]. 2022  
398 [cited 2024 Aug 7]. Available from: [https://www.ema.europa.eu/en/human-](https://www.ema.europa.eu/en/human-regulatory-overview/research-development/compliance-research-development/good-clinical-practice)  
399 [regulatory-overview/research-development/compliance-research-development/good-](https://www.ema.europa.eu/en/human-regulatory-overview/research-development/compliance-research-development/good-clinical-practice)  
400 [clinical-practice](https://www.ema.europa.eu/en/human-regulatory-overview/research-development/compliance-research-development/good-clinical-practice)
- 401 19. Pilot and Feasibility Studies [Internet]. [cited 2024 Aug 7]. Available from:  
402 [https://www.journalslibrary.nihr.ac.uk/information-for-authors/Full-Final-](https://www.journalslibrary.nihr.ac.uk/information-for-authors/Full-Final-Report/report-contents/report-types/pilot-and-feasibility-studies.htm)  
403 [Report/report-contents/report-types/pilot-and-feasibility-studies.htm](https://www.journalslibrary.nihr.ac.uk/information-for-authors/Full-Final-Report/report-contents/report-types/pilot-and-feasibility-studies.htm)
- 404 20. Julious SA. Sample size of 12 per group rule of thumb for a pilot study.  
405 *Pharmaceutical Statistics*. 2005;4(4):287–91.
- 406 21. cy-WPE-PRD. Cross-Cultural Adaptation of POLST to Brazil [Internet].  
407 POLST. 2018 [cited 2024 Aug 7]. Available from: [https://polst.org/2018/03/06/cross-](https://polst.org/2018/03/06/cross-cultural-adaptation-of-polst-to-brazil/)  
408 [cultural-adaptation-of-polst-to-brazil/](https://polst.org/2018/03/06/cross-cultural-adaptation-of-polst-to-brazil/)
- 409 22. Wild D, Grove A, Martin M, Eremenco S, McElroy S, Verjee-Lorenz A, et al.  
410 Principles of Good Practice for the Translation and Cultural Adaptation Process for  
411 Patient-Reported Outcomes (PRO) Measures: Report of the ISPOR Task Force for  
412 Translation and Cultural Adaptation. *Value in Health*. 2005 Mar;8(2):94–104.
- 413 23. Center for Ethics | OHSU [Internet]. [cited 2024 Mar 6]. Available from:  
414 <https://www.ohsu.edu/center-for-ethics>
- 415 24. Zive DM, Jimenez VM, Fromme EK, Tolle SW. Changes Over Time in the  
416 Oregon Physician Orders for Life-Sustaining Treatment Registry: A Study of Two  
417 Decedent Cohorts. *J Palliat Med*. 2019 Dec;22(5):500–7.
- 418 25. Hickman SE, Tolle SW, Brummel-Smith K, Carley MM. Use of the Physician  
419 Orders for Life-Sustaining Treatment program in Oregon nursing facilities: beyond  
420 resuscitation status. *J Am Geriatr Soc*. 2004 Sep;52(9):1424–9.

- 421 26. Lovadini GB, Fukushima FB, Schoueri JFL, dos Reis R, Fonseca CGF,  
422 Rodriguez JJC, et al. To What Extent Do Physician Orders for Life-Sustaining  
423 Treatment (POLST) Reflect Patients' Preferences for Care at the End of Life? *J Am*  
424 *Med Dir Assoc.* 2021 Feb;22(2):334-339.e2.
- 425 27. Rotondi MA, Donner A. A confidence interval approach to sample size  
426 estimation for interobserver agreement studies with multiple raters and outcomes. *J*  
427 *Clin Epidemiol.* 2012 Jul;65(7):778-84.
- 428 28. Mayoral VFS, Fukushima FB, Rodrigues AM, Carvalho RP, Carvalho LP,  
429 Pinheiro LAFV, et al. Cross-Cultural Adaptation of the Physician Orders for Life-  
430 Sustaining Treatment Form to Brazil. *J Palliat Med.* 2018 Jun;21(6):815-9.
- 431 29. Torke AM, Hickman SE, Hammes B, Counsell SR, Inger L, Slaven JE, et al.  
432 POLST Facilitation in Complex Care Management: A Feasibility Study. *Am J Hosp*  
433 *Palliat Care.* 2019 Jan;36(1):5-12.
- 434 30. Vranas KC, Plinke W, Bourne D, Kansagara D, Lee RY, Kross EK, et al. The  
435 influence of POLST on treatment intensity at the end of life: A systematic review. *J*  
436 *Am Geriatr Soc.* 2021 Dec;69(12):3661-74.
- 437 31. Committee on Approaching Death: Addressing Key End of Life Issues,  
438 Institute of Medicine. *Dying in America: Improving Quality and Honoring Individual*  
439 *Preferences Near the End of Life* [Internet]. Washington (DC): National Academies  
440 Press (US); 2015 [cited 2024 Feb 25]. Available from:  
441 <http://www.ncbi.nlm.nih.gov/books/NBK285681/>
- 442 32. Pedraza SL, Culp S, Falkenstine EC, Moss AH. POST Forms More Than  
443 Advance Directives Associated With Out-of-Hospital Death: Insights From a State  
444 Registry. *J Pain Symptom Manage.* 2016 Feb;51(2):240-6.
- 445 33. POLST [Internet]. [cited 2024 Feb 25]. POLST: Portable medical orders for  
446 seriously ill or frail individuals. Available from: <https://polst.org/>



- 447 34. Span P. The New Old Age Blog. 1291662737 [cited 2023 Nov 3]. D.N.R. by  
448 Another Name. Available from:  
449 [https://archive.nytimes.com/newoldage.blogs.nytimes.com/2010/12/06/d-n-r-by-](https://archive.nytimes.com/newoldage.blogs.nytimes.com/2010/12/06/d-n-r-by-another-name/)  
450 [another-name/](https://archive.nytimes.com/newoldage.blogs.nytimes.com/2010/12/06/d-n-r-by-another-name/)
- 451 35. Exploring Perceptions of “Do Not Resuscitate” and “Allowing Natural Death”  
452 Among Physicians and Nurses [Internet]. [cited 2024 Feb 25]. Available from:  
453 [//www.nursingcenter.com/journalarticle?Article\\_ID=1081182](http://www.nursingcenter.com/journalarticle?Article_ID=1081182)
- 454 36. Vincent JL, Berré J, Creteur J. Withholding and withdrawing life prolonging  
455 treatment in the intensive care unit: a current European perspective. *Chron*  
456 *Respir Dis*. 2004 Apr 1;1(2):115–20.
- 457 37. Sprung CL, Cohen SL, Sjokvist P, Baras M, Bulow HH, Hovilehto S, et al.  
458 End-of-life practices in European intensive care units: the Ethicus Study. *JAMA*.  
459 2003 Aug 13;290(6):790–7.
- 460 38. Vincent JL. Forgoing life support in western European intensive care units: the  
461 results of an ethical questionnaire. *Crit Care Med*. 1999 Aug;27(8):1626–33.
- 462 39. Oviedo Convention and its Protocols - Human Rights and Biomedicine  
463 [Internet]. [cited 2024 Apr 16]. Available from:  
464 <https://www.coe.int/en/web/bioethics/oviedo-convention>
- 465 40. Trokanas T. Medical Decision-Making on Behalf of Critically-Ill minors in  
466 Greece. Hart Publishing [Internet]. 2020 Jan 1 [cited 2024 Jun 12]; Available from:  
467 [https://www.academia.edu/42980118/Medical\\_Decision\\_Making\\_on\\_Behalf\\_of\\_Criti-](https://www.academia.edu/42980118/Medical_Decision_Making_on_Behalf_of_Critically_Ill_minors_in_Greece)  
468 [cally\\_Ill\\_minors\\_in\\_Greece](https://www.academia.edu/42980118/Medical_Decision_Making_on_Behalf_of_Critically_Ill_minors_in_Greece)
- 469 41. Mookink LB, Terwee CB, Patrick DL, Alonso J, Stratford PW, Knol DL, et al.  
470 The COSMIN checklist for assessing the methodological quality of studies on  
471 measurement properties of health status measurement instruments: an international  
472 Delphi study. *Qual Life Res*. 2010 Dec;19(4):539–49.

473 42. Mokkink LB, Terwee CB, Patrick DL, Alonso J, Stratford PW, Knol DL, et al.  
474 The COSMIN study reached international consensus on taxonomy, terminology, and  
475 definitions of measurement properties for health-related patient-reported outcomes. J  
476 Clin Epidemiol. 2010 Jul;63(7):737–45.

477 43. Mokkink L, Terwee C, Knol D, Stratford P, Alonso J, Patrick D, et al. The  
478 COSMIN checklist for evaluating the methodological quality of studies on  
479 measurement properties: A clarification of its content. BMC medical research  
480 methodology. 2010 Mar 1;10:22.

481 44. Comparison of 6 Mortality Risk Scores for Prediction of 1-Year Mortality  
482 Risk in Older Adults With Multimorbidity | Geriatrics | JAMA Network Open |  
483 JAMA Network [Internet]. [cited 2024 Mar 6]. Available from:  
484 <https://jamanetwork.com/journals/jamanetworkopen/fullarticle/2794703>

485 Appendix

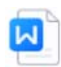

ATTIKON POLST  
MODIFIED.docx

486

**Table 1.** Population characteristics and preferences for Cardiopulmonary Resuscitation Orders and Treatment Plan

|                                                                        |           |
|------------------------------------------------------------------------|-----------|
| Person completing questionnaire                                        | N (%)     |
| Patient                                                                | 6 (19.4)  |
| Legally authorized representative                                      | 4 (12.9)  |
| Relative, other closed person                                          | 21 (67.7) |
| Underlying condition                                                   |           |
| Infection                                                              | 5 (16.1)  |
| Aspiration                                                             | 4 (12.9)  |
| Heart failure                                                          | 5 (16.1)  |
| Malignancy                                                             | 10 (32.3) |
| Central nervous system condition (stroke or neurodegenerative disease) | 7 (22.6)  |
| Questionnaire data                                                     |           |
| Attempt CPR*                                                           | 15 (48.4) |
| Do not attempt CPR                                                     | 16 (51.6) |
| Comfort measures only                                                  | 10 (32.3) |
| Selective treatment                                                    | 13 (32.3) |
| Full treatment                                                         | 8 (25.8)  |

\* CPR: cardiopulmonary resuscitation

**Table 2.** Covariates examined regarding end-of-life decision. Statistical significance for patients desiring or not desiring intervention is shown with an asterisk. For continuous variables we used independent samples t – test, for categorical chi square and risk estimate

|                                   | <b>Attempt CPR* (Y/N)</b> | <b>Do not attempt CPR (Y/N)</b> | <b>Comfort measures only (Y/N)</b> | <b>Selective treatment</b> | <b>Full treatment</b> |
|-----------------------------------|---------------------------|---------------------------------|------------------------------------|----------------------------|-----------------------|
| <b>Age &gt;= 65 yrs old, N=26</b> | 17 (65,4%)                | 9 (34,6%)                       | 8 (30,8%)                          | 11 (42,3%)                 | 7 (26,9%)             |
| <b>Malignancy, N=10</b>           | 3 (30%)*                  | 7 (70%)*                        | 6 (60%)*                           | 3 (30%)                    | 1 (10%)               |
| <b>CNS disorder, N=5</b>          | 3 (60%)                   | 2 (40%)                         | 1(20%)                             | 2(40%)                     | 2(40%)                |
| <b>Infection, N=6</b>             | 5 (83,3%)                 | 1 (16,7%)                       | 2 (33,3%)                          | 2 (33,3%)                  | 2 (33,3%)             |
| <b>Aspiration, N=4</b>            | 3 (75%)                   | 1 (25%)                         | 1 (25%)                            | 2 (50%)                    | 1 (25%)               |
| <b>Heart failure, N=5</b>         | 5 100%)                   | 0 (0,00)                        | 0 (0%)                             | 3 (60%)                    | 2 (40%)               |

\* P <= 0.05



## CROSS-CULTURAL ADAPTATION PROCESS

1

Preparation

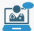

Contact with OHSU for permission to use the Oregon POI ST form and initiation for collaboration

2

Translation

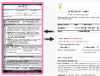

Development of two independent forward translations reconciliation and back translation were performed

3

Harmonization

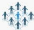

Meeting with back translators  
Reconciliation of all new translations with result table and the Oregon POI ST form

4

Cognitive Debriefing

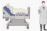

A pilot study was conducted on a group of 30 patients hospitalized in the Internal Medicine ward

5

Finalizing  
Final report

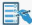

Finalizing of the finalized translation & report on the development of the translation
